# Supplementary material for: In vitro antioxidant potential of Shemamruthaa (a herbal formulation) and its anticancer activity in the MCF-7 cell line
Source: Royal Society of Chemistry journal article supplement (doi:10.1039/c4ra12346h), 2015-01-01
Supplement: c4ra12346h1.pdf [file c4ra12346h1.pdf]

The following GC-MS and HPLC data (accepted for publication) show the presence of bioactive constituents and indicate that *SM* contains potential anti-cancer agents acting in synergistic manner against breast cancer cell proliferation.

A representative GC-MS chromatogram of the extract from herbal constituents of *SM* is provided in **Figure S1**. The obvious complexities of the sample are visible. Identification of the samples by their mass spectrum identity is carried out by matching scores from the MS library. As elucidated by GC-MS spectrum, the various chemical constituents and their retention times, molecular formula, molecular weight and percentage compositions are given in **Table S1**.

**Table S1 Major phytochemical components identified through the gas chromatography-mass spectrometry (GC-MS) analysis of ethanol extract of herbal constituents of *SM*.**

| S. No. | Retention time (min) | Name of the compound                                                 | Molecular formula                              | Molecular weight | Peak Area % |
|--------|----------------------|----------------------------------------------------------------------|------------------------------------------------|------------------|-------------|
| 1.     | 2.46                 | 2-Cyclohexen-1-one, 4-hydroxy-                                       | C <sub>6</sub> H <sub>8</sub> O <sub>2</sub>   | 112              | 8.04        |
| 2.     | 4.65                 | 2-Furancarboxaldehyde, 5-(hydroxymethyl)- [ 5-Hydrxoymethylfurfural] | C <sub>6</sub> H <sub>6</sub> O <sub>3</sub>   | 126              | 16.42       |
| 3.     | 6.72                 | 1,2,3-Benzenetriol [Pyrogallol]                                      | C <sub>6</sub> H <sub>6</sub> O <sub>3</sub>   | 126              | 57.62       |
| 4.     | 8.39                 | 1,6-Anhydro- $\alpha$ -D-glucopyranose [Levoglucozan]                | C <sub>6</sub> H <sub>10</sub> O <sub>5</sub>  | 162              | 13.32       |
| 5.     | 9.68                 | 7,8-Epoxy lanostan-11-ol, 3-acetoxy-                                 | C <sub>32</sub> H <sub>54</sub> O <sub>4</sub> | 502              | 1.26        |
| 6.     | 13.61                | Dipalmitin                                                           | C <sub>35</sub> H <sub>68</sub> O <sub>5</sub> | 568              | 2.34        |
| 7.     | 16.44                | Trilinolein                                                          | C <sub>57</sub> H <sub>98</sub> O <sub>6</sub> | 878              | 1.00        |

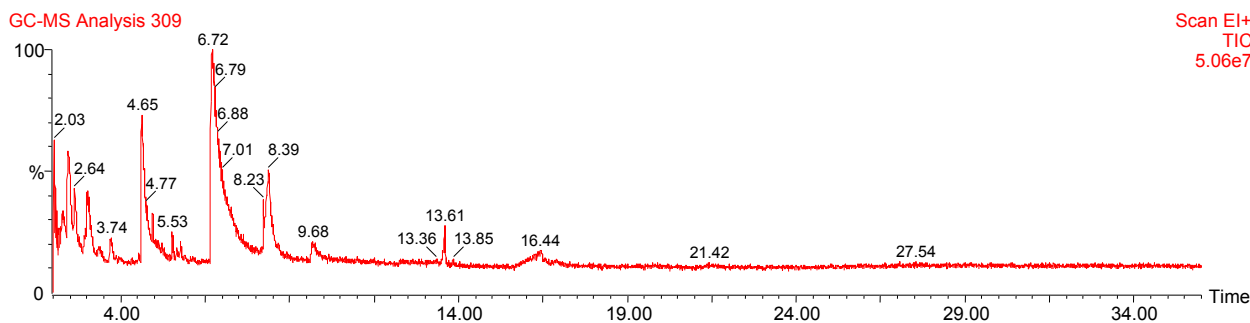

**Fig. S1. A representative GC-MS chromatogram of ethanol extract of herbal constituents of SM.**

Compounds such as 1,2,3-Benzenetriol [Pyrogallol]; 2-Furancarboxaldehyde,5-(hydroxymethyl)- [5-Hydrxoymethylfurfural]; 1,6-Anhydro- $\alpha$ -D-glucopyranose [Levoglucozan]; 2-Cyclohexen-1-one, 4-hydroxy-; Dipalmitin; 7,8-Epoxy lanostan-11-ol, 3-acetoxy- and Trilinolein are some of the major compounds found in the extract. Earlier studies indicated that the secondary metabolites such as flavonoids may have undergone cleavage at the C-ring (right with the functional group C=O) as suggested by Buchner *et al.*, (2006), possibly giving rise to the above compounds, including substituted mono-, di- and tri-hydroxybenzenes (Moldoveanu, 2009; Rodgman and Perfetti, 2009).

**Fig. S2** and **Fig. S3** show the HPLC chromatogram of the standard flavonoids used and the chromatogram of representative sample, respectively. As shown in **Fig. S2**, the five flavonoid standards used were gallic acid, caffeic acid, rutin, quercetin and ferulic acid. The standards were selected based on the most commonly found and studied flavonoids in herbs and vegetables. **Fig. S3** revealed the presence of gallic acid, caffeic acid, rutin, quercetin and ferulic acid. The peak area and concentrations of standard flavonoids and flavonoids identified in the sample are portrayed in **Table S2** and **Table S3** The major flavonoids in the extract are gallic acid (992.25  $\mu\text{g/g}$ ), quercetin (335.75  $\mu\text{g/g}$ ), caffeic acid (156.6  $\mu\text{g/g}$ ), followed by rutin (6.0  $\mu\text{g/g}$ ) and ferulic acid (0.3  $\mu\text{g/g}$ ).

TABLE S2

## Retention time and area of five kinds of standard flavonoids

| Detector A (280nm)   |          |         |                       |              |
|----------------------|----------|---------|-----------------------|--------------|
| Retention Time (min) | Area     | Height  | Concentration (µg/ml) | Name         |
| 5.750                | 56744802 | 2757981 | 10.00                 | Gallic acid  |
| 9.450                | 17443471 | 1882880 | 10.00                 | Caffeic acid |
| 10.517               | 42056735 | 3198304 | 10.00                 | Rutin        |
| 12.400               | 13396467 | 1402866 | 10.00                 | Quercetin    |
| 24.175               | 2810655  | 36358   | 10.00                 | Ferulic acid |

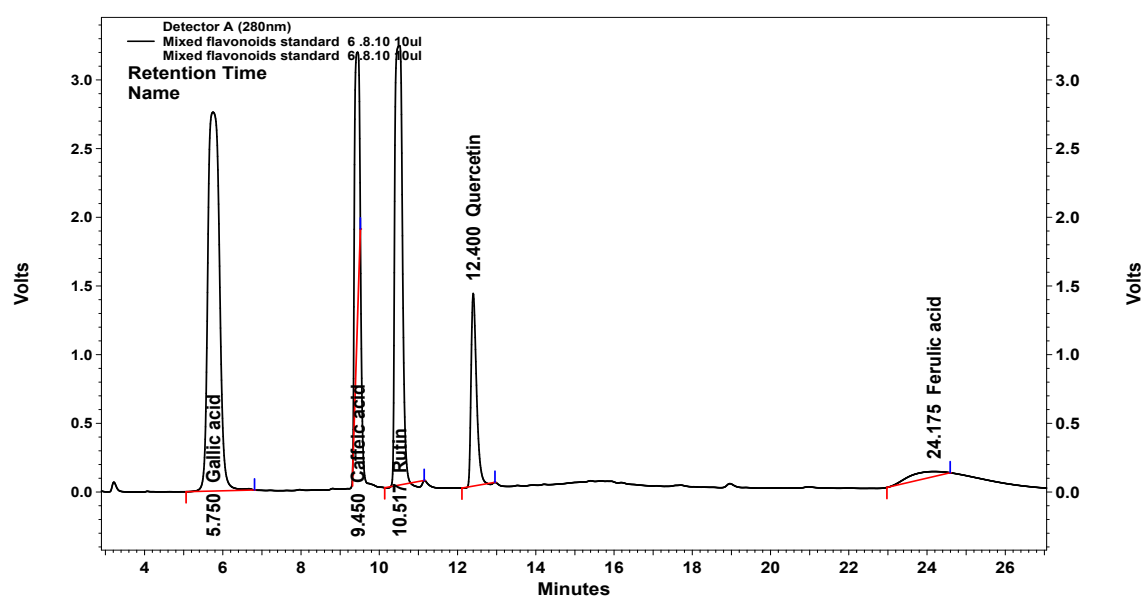

Fig. S2

**HPLC-DAD chromatogram of the flavonoid standards used in the study. The flavonoid chromatogram of gradient HPLC was detected using C18 column monitored at 280 nm.**

**Standards:** Gallic acid, Caffeic acid, Rutin, Quercetin and Ferulic acid. **Operating parameters:** Mobile Phase: Solvent A- Water: Acetic acid (25:1), Solvent B- Methanol; Pumps (Binary Gradient); T.Flow: 1.000 ml/min; P.Max: 400.0 kgf/cm<sup>2</sup>; P.Min: 0.0 kgf/cm<sup>2</sup>; CTO-10 ASvp, Temperature: 40 °C; SPD-10 Avp (Det.A): Lamp: D<sub>2</sub>; Polarity: +Ve.

TABLE S3

Retention time, area and concentrations of five different flavonoid constituents present in the ethanol extract of herbal constituents of SM.

| Detector A (280nm)   |          |        |                                            |              |
|----------------------|----------|--------|--------------------------------------------|--------------|
| Retention Time (min) | Area     | Height | Concentration ( $\mu\text{g/g}$ of sample) | Name         |
| 5.917                | 18772693 | 9094   | 992.25                                     | Gallic acid  |
| 9.000                | 910911   | 115    | 156.60                                     | Caffeic acid |
| 10.217               | 94371    | 4068   | 6.00                                       | Rutin        |
| 12.525               | 1499277  | 54846  | 335.75                                     | Quercetin    |
| 24.108               | 2182     | 125    | 0.30                                       | Ferulic acid |

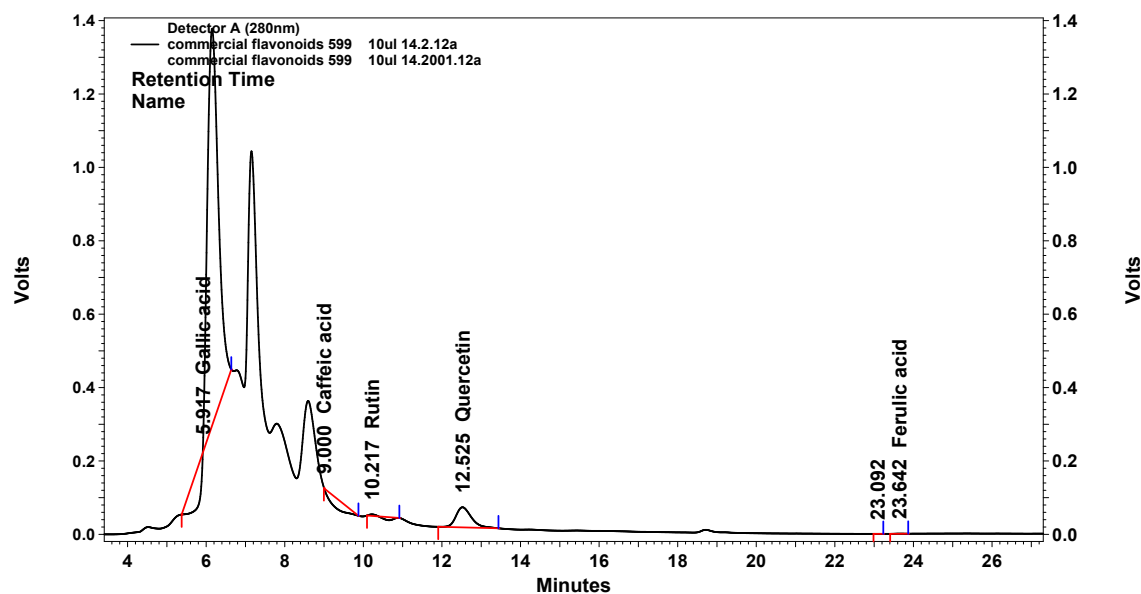

Fig S3

Chromatogram of representative sample (extract of herbal constituents of SM) tested in the study. The flavonoids were detected using C18 column monitored at 280 nm.

**Operating parameters:** Mobile Phase: Solvent A- Water: Acetic acid (25:1), Solvent B- Methanol; Pumps (Binary Gradient); T.Flow: 1.000 ml/min; P.Max: 400.0 kgf/cm<sup>2</sup>; P.Min: 0.0 kgf/cm<sup>2</sup>; CTO-10ASvp, Temperature: 40 °C; SPD-10 Avp(Det.A): Lamp: D<sub>2</sub>; Polarity: +Ve.

*Phytochemicals have attracted a growing attention as anti-cancer agents due to their ability to modulate apoptosis signalling pathways and the study of herbal formulations from traditional medicine represents a challenging research field, since it has been applied for the treatment of cancers for many years. In this perspective, Shemamruthaa, a phytochemical combinant constituting dried flowers of Hibiscus rosasinensis, fruits of Phyllanthus emblica and honey was formulated and evaluated for the first time with a view to potentiate more intense anticancer property.*
